# Supplementary material for: Effect of Form of Silicon and the Timing of a Single Foliar Application on Sugar Beet Yield
Source: MDPI journal article supplement (doi:10.3390/agriculture14010086), 2023-12-31
Supplement: s1 [file s1]

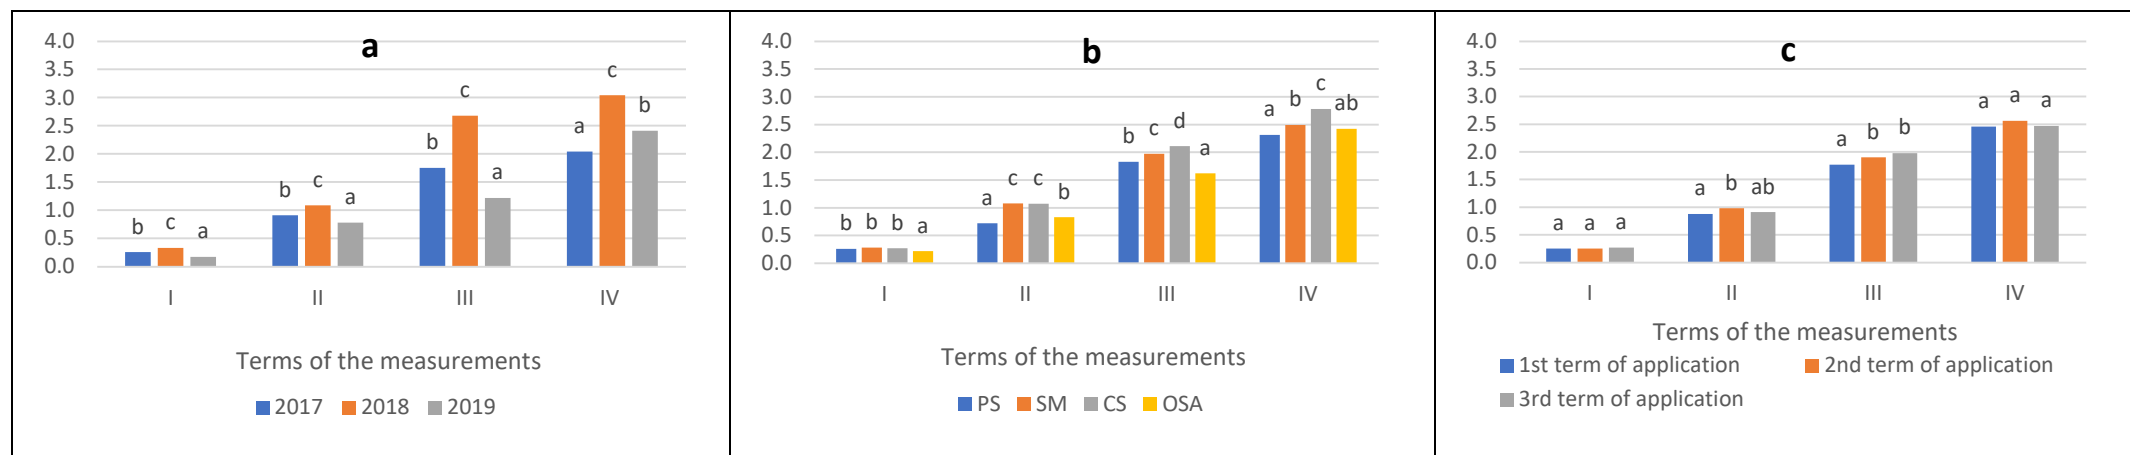

**Figure S1.** Changes of LAI in years of the experiment (a); depending on silicon form in 2017-2019 (b); depending on term of foliar application in 2017-2019 (c). The same letters indicate lack of significant differences at  $P=0.05$ .

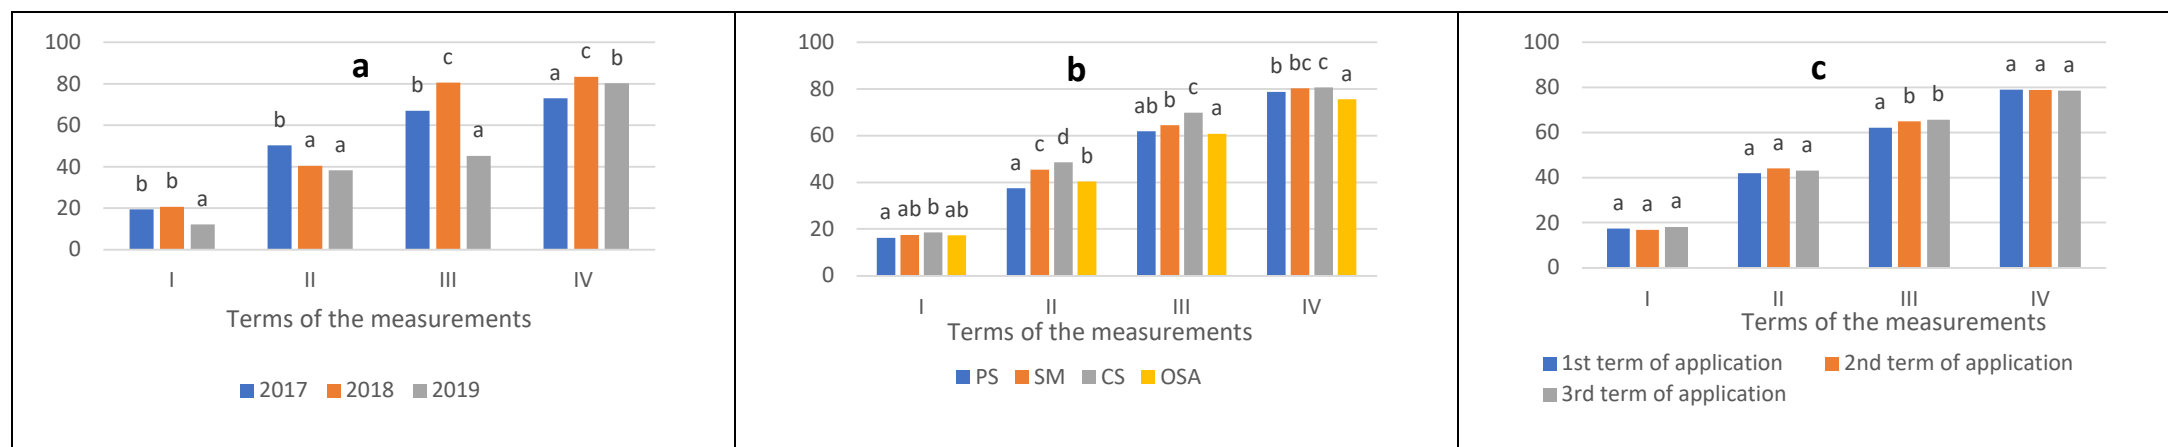

**Figure S2.** Changes of PAR absorption in years of the experiment (a); depending on silicon form in 2017-2019 (b); depending on term of foliar application in 2017-2019 (c), %. The same letters indicate lack of significant differences at  $P=0.05$ .

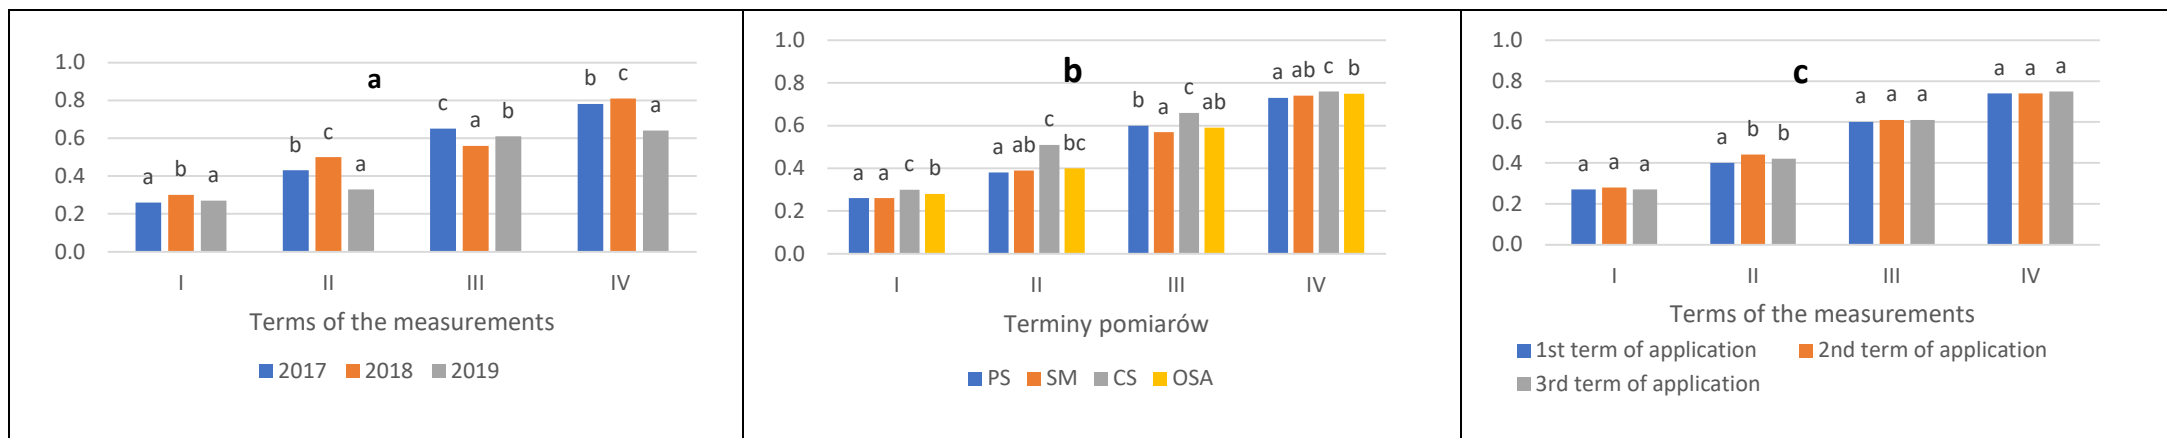

**Figure S3.** Changes of NDVI value in years of the experiment (a); depending on silicon form in 2017-2019 (b); depending on term of foliar application in 2017-2019 (c). The same letters indicate lack of significant differences at  $P=0.05$ .

**Table S1.** Fertilization treatments in the experiment (2016/2017–2018/2019).

| Fertilizer                                                                                                                                                                                       | Rate, kg, dm <sup>3</sup><br>ha <sup>-1</sup> | Date       |
|--------------------------------------------------------------------------------------------------------------------------------------------------------------------------------------------------|-----------------------------------------------|------------|
| 2016/2017                                                                                                                                                                                        |                                               |            |
| Polifoska Tytan (N – 60 g kg <sup>-1</sup> , P – 109 g kg <sup>-1</sup> , K – 109 g kg <sup>-1</sup> , S – 20 g kg <sup>-1</sup> , Fe – 5 g kg <sup>-1</sup> , Zn – 0.5 g kg <sup>-1</sup> + Ti) | 420                                           | 17.10.2016 |
| Sól potasowa (K – 498 g kg <sup>-1</sup> )                                                                                                                                                       | 300                                           |            |
| Saletrzak 27 Standard with boron (N – 270 g kg <sup>-1</sup> , Ca – 14.3 g kg <sup>-1</sup> , Mg – 24.1 g kg <sup>-1</sup> , B – 2 g kg <sup>-1</sup> )                                          | 500                                           | 29.03.2017 |
| CukroVit Borowy (B – 108 g kg <sup>-1</sup> )                                                                                                                                                    | 2                                             | 29.05.2017 |
| CukroVit Borowy (B – 108 g kg <sup>-1</sup> )                                                                                                                                                    | 2                                             | 12.06.2017 |
| In total (kg ha <sup>-1</sup> ): N – 160; P – 45.8; K – 195; S – 8.4; Ca – 7.2; Mg – 12.1; B – 1.4; Fe – 2.1; Zn – 0.2 + Ti                                                                      |                                               |            |
| 2017/2018                                                                                                                                                                                        |                                               |            |
| Polifoska 6 (N – 60 g kg <sup>-1</sup> , P – 87.2 g kg <sup>-1</sup> , K – 249 g kg <sup>-1</sup> , S – 28 g kg <sup>-1</sup> )                                                                  | 400                                           | 16.10.2017 |
| Potassium chloride (K – 498 g kg <sup>-1</sup> )                                                                                                                                                 | 300                                           |            |
| Salmag with boron (N – 275 g kg <sup>-1</sup> , Ca – 25 g kg <sup>-1</sup> , Mg – 24.1 g kg <sup>-1</sup> , B – 2 g kg <sup>-1</sup> )                                                           | 550                                           | 09.04.2018 |
| Adob Bor (N – 78 g dm <sup>-3</sup> , B – 150 g dm <sup>-3</sup> )                                                                                                                               | 2                                             | 28.05.2018 |
| Adob Bor (N – 78 g dm <sup>-3</sup> , B – 150 g dm <sup>-3</sup> )                                                                                                                               | 2                                             | 11.06.2017 |
| Łącznie (kg ha <sup>-1</sup> ): N – 176; P – 34.9; K – 249; S – 11.2; Ca – 13.8; Mg – 13.3; B – 1.7                                                                                              |                                               |            |
| 2018/2019                                                                                                                                                                                        |                                               |            |
| Polifoska 6 (N – 60 g kg <sup>-1</sup> , P – 87.2 g kg <sup>-1</sup> , K – 249 g kg <sup>-1</sup> , S – 28 g kg <sup>-1</sup> )                                                                  | 400                                           | 15.10.2018 |
| Potassium chloride (K – 498 g kg <sup>-1</sup> )                                                                                                                                                 | 300                                           |            |
| Saletrzak 27 Standard with boron (N – 270 g kg <sup>-1</sup> , Ca – 14.3 g kg <sup>-1</sup> , Mg – 24.1 g kg <sup>-1</sup> , B – 2 g kg <sup>-1</sup> )                                          | 500                                           | 09.03.2019 |
| Boron Forte (N – 30 g kg <sup>-1</sup> , K – 141 g kg <sup>-1</sup> , B – 210 g kg <sup>-1</sup> )                                                                                               | 1.5                                           | 27.05.2019 |
| Boron Forte (N – 30 g kg <sup>-1</sup> , K – 141 g kg <sup>-1</sup> , B – 210 g kg <sup>-1</sup> )                                                                                               | 1.5                                           | 10.06.2019 |
| In total (kg ha <sup>-1</sup> ): N – 159; P – 34.9; K – 249; S – 11.2; Ca – 7.2; Mg – 12.1; B – 1.63                                                                                             |                                               |            |

**Table S2.** Number of sugar beet plants at harvest depending on the form of silicon (A) and the term of foliar application (B) (in 2017–2019), thousand plants ha<sup>-1</sup>.

| Silicon form <sup>1</sup> |       |                  | Term of application <sup>1</sup> |       |        |       | Mean  |           |
|---------------------------|-------|------------------|----------------------------------|-------|--------|-------|-------|-----------|
| B1                        |       |                  | B2                               |       | B3     |       |       |           |
| 2017                      |       |                  |                                  |       |        |       |       |           |
| A1                        | 92.71 | abc <sup>2</sup> | 98.70                            | c     | 99.65  | c     | 97.02 | B         |
| A2                        | 84.10 | ab               | 82.83                            | ab    | 88.54  | abc   | 85.16 | A         |
| A3                        | 98.96 | c                | 83.06                            | ab    | 94.10  | bc    | 92.04 | AB        |
| A4                        | 93.06 | abc              | 81.54                            | a     | 92.19  | abc   | 88.93 | A         |
| Mean                      | 92.21 | AB               | 86.53                            | A     | 93.62  | B     | 90.79 | B         |
| 2018                      |       |                  |                                  |       |        |       |       |           |
| A1                        | 90.25 | bcd              | 89.58                            | bcd   | 89.79  | bcd   | 89.88 | B         |
| A2                        | 81.60 | ab               | 93.06                            | d     | 91.67  | cd    | 88.77 | B         |
| A3                        | 77.01 | a                | 94.44                            | d     | 75.45  | a     | 82.30 | A         |
| A4                        | 75.97 | a                | 81.94                            | ab    | 82.36  | abc   | 80.09 | A         |
| Mean                      | 81.21 | A                | 89.76                            | B     | 84.82  | A     | 85.26 | A         |
| 2019                      |       |                  |                                  |       |        |       |       |           |
| A1                        | 81.84 | ab               | 90.97                            | bc    | 79.32  | a     | 84.05 | a         |
| A2                        | 95.14 | c                | 91.67                            | bc    | 88.89  | abc   | 91.90 | b         |
| A3                        | 94.44 | c                | 86.11                            | abc   | 94.44  | c     | 91.67 | b         |
| A4                        | 87.15 | abc              | 84.03                            | abc   | 91.32  | bc    | 87.50 | ab        |
| Mean                      | 89.64 | A                | 88.19                            | A     | 88.49  | A     | 88.78 | B         |
| 2017–2019                 |       |                  |                                  |       |        |       |       |           |
| A1                        | 88.27 | abc              | 93.09                            | c     | 89.59  | abc   | 90.31 | B         |
| A2                        | 86.95 | abc              | 89.18                            | abc   | 89.70  | abc   | 88.61 | AB        |
| A3                        | 90.14 | bc               | 87.87                            | abc   | 88.00  | abc   | 88.67 | AB        |
| A4                        | 85.39 | ab               | 82.51                            | a     | 88.62  | abc   | 85.51 | A         |
| Mean                      | 87.69 | A                | 88.16                            | A     | 88.98  | A     | -     |           |
| P-values based on ANOVA   |       | Y                | A                                | B     | Y x A  | Y x B | A x B | Y x A x B |
|                           |       | <0.05            | 0.074                            | 0.716 | <0.005 | <0.05 | 0.336 | <0.05     |

<sup>1</sup> – see Table 4; <sup>2</sup> the same lowercase letters mean no significant differences between the combinations of silicon forms and foliar application dates, while the same uppercase letters mean no significant differences between the means for the silicon form (this applies to the last column) or between the means for the application dates (row comparisons) or between averages for years (capital letters written in italics). All mean comparisons are at P = 0.05.

**Table S3.** Root yield of sugar beet plants at harvest depending on the form of silicon (A) and the term of foliar application (B) (in 2017–2019), t ha<sup>-1</sup>.

| Silicon form <sup>1</sup> |        |                   | Term of application <sup>1</sup> |       |        |       | Mean   |           |
|---------------------------|--------|-------------------|----------------------------------|-------|--------|-------|--------|-----------|
| B1                        |        |                   | B2                               |       | B3     |       |        |           |
| 2017                      |        |                   |                                  |       |        |       |        |           |
| A1                        | 100.31 | abcd <sup>2</sup> | 102.59                           | abcd  | 103.37 | abcd  | 102.09 | AB        |
| A2                        | 97.28  | ab                | 97.34                            | ab    | 107.77 | cd    | 100.79 | A         |
| A3                        | 108.02 | cd                | 95.10                            | a     | 99.05  | abc   | 100.72 | A         |
| A4                        | 105.64 | bcd               | 106.16                           | bcd   | 108.35 | d     | 106.72 | B         |
| Mean                      | 102.81 | A                 | 100.30                           | A     | 104.64 | A     | 102.58 | C         |
| 2018                      |        |                   |                                  |       |        |       |        |           |
| A1                        | 64.96  | ab                | 64.58                            | ab    | 64.32  | ab    | 64.62  | A         |
| A2                        | 60.61  | a                 | 67.12                            | ab    | 66.70  | ab    | 64.81  | A         |
| A3                        | 60.40  | a                 | 69.46                            | b     | 61.27  | a     | 63.71  | A         |
| A4                        | 60.55  | a                 | 65.16                            | ab    | 63.57  | ab    | 63.10  | A         |
| Mean                      | 61.63  | A                 | 66.58                            | B     | 63.96  | AB    | 64.06  | A         |
| 2019                      |        |                   |                                  |       |        |       |        |           |
| A1                        | 89.96  | b                 | 77.02                            | a     | 72.71  | a     | 79.90  | B         |
| A2                        | 77.10  | a                 | 68.23                            | a     | 75.69  | a     | 73.67  | AB        |
| A3                        | 79.64  | ab                | 78.68                            | ab    | 70.99  | a     | 76.44  | AB        |
| A4                        | 77.45  | ab                | 68.96                            | a     | 70.12  | a     | 72.18  | A         |
| Mean                      | 81.04  | B                 | 73.22                            | A     | 72.38  | A     | 75.55  | B         |
| 2017–2019                 |        |                   |                                  |       |        |       |        |           |
| A1                        | 85.07  | a                 | 81.40                            | a     | 80.13  | a     | 82.20  | A         |
| A2                        | 78.33  | a                 | 77.56                            | a     | 83.39  | a     | 79.76  | A         |
| A3                        | 82.69  | a                 | 81.08                            | a     | 77.10  | a     | 80.29  | A         |
| A4                        | 81.21  | a                 | 80.10                            | a     | 80.68  | a     | 80.66  | A         |
| Mean                      | 81.83  | A                 | 80.03                            | A     | 80.33  | A     | -      |           |
| P-value                   | based  | on                | Y                                | A     | B      | Y x A | Y x B  | A x B     |
| ANOVA                     |        |                   |                                  |       |        |       |        | Y x A x B |
|                           |        |                   | <0.05                            | 0.485 | 0.402  | 0.060 | <0.05  | 0.110     |
|                           |        |                   |                                  |       |        |       |        | 0.403     |

<sup>1</sup>; <sup>2</sup> see Table 4.

**Table S4.** Yield of leaves of sugar beet plants at harvest depending on the form of silicon (A) and the term of foliar application (B) (in 2017–2019), t ha<sup>-1</sup>.

| Silicon form <sup>1</sup> |       |                 | Term of application <sup>1</sup> |       |       |       | Mean  |           |
|---------------------------|-------|-----------------|----------------------------------|-------|-------|-------|-------|-----------|
| B1                        |       |                 | B2                               |       | B3    |       |       |           |
| 2017                      |       |                 |                                  |       |       |       |       |           |
| A1                        | 59.95 | bc <sup>2</sup> | 59.81                            | bc    | 58.77 | bc    | 59.51 | A         |
| A2                        | 49.74 | a               | 59.08                            | bc    | 59.05 | bc    | 55.95 | A         |
| A3                        | 65.25 | c               | 49.84                            | a     | 54.24 | ab    | 56.44 | A         |
| A4                        | 62.12 | bc              | 55.31                            | ab    | 60.52 | bc    | 59.32 | A         |
| Mean                      | 59.26 | A               | 56.01                            | A     | 58.14 | A     | 57.81 | B         |
| 2018                      |       |                 |                                  |       |       |       |       |           |
| A1                        | 35.54 | ab              | 34.98                            | ab    | 36.35 | ab    | 35.62 | A         |
| A2                        | 37.14 | ab              | 35.33                            | ab    | 32.50 | a     | 34.99 | A         |
| A3                        | 34.44 | ab              | 45.52                            | c     | 39.08 | b     | 39.68 | B         |
| A4                        | 32.23 | a               | 46.44                            | c     | 40.34 | bc    | 39.67 | B         |
| Mean                      | 34.83 | A               | 40.57                            | B     | 37.07 | A     | 37.49 | A         |
| 2019                      |       |                 |                                  |       |       |       |       |           |
| A1                        | 33.77 | a               | 34.69                            | a     | 34.37 | a     | 34.28 | A         |
| A2                        | 42.47 | bcd             | 35.36                            | ab    | 35.90 | ab    | 37.91 | AB        |
| A3                        | 46.07 | d               | 45.05                            | cd    | 34.13 | a     | 41.75 | B         |
| A4                        | 36.63 | ab              | 38.24                            | abc   | 34.57 | a     | 36.48 | A         |
| Mean                      | 39.73 | B               | 38.34                            | AB    | 34.74 | A     | 37.60 | A         |
| 2017–2019                 |       |                 |                                  |       |       |       |       |           |
| A1                        | 43.08 | a               | 43.16                            | a     | 43.16 | a     | 43.14 | A         |
| A2                        | 43.11 | a               | 43.26                            | a     | 42.48 | a     | 42.95 | A         |
| A3                        | 48.58 | a               | 46.81                            | a     | 42.48 | a     | 45.96 | B         |
| A4                        | 43.66 | a               | 46.66                            | a     | 45.14 | a     | 45.16 | AB        |
| Mean                      | 44.61 | A               | 44.97                            | A     | 43.32 | A     | -     |           |
| P-values                  | based | on              | Y                                | A     | B     | Y x A | Y x B | A x B     |
| ANOVA                     |       |                 |                                  |       |       |       |       | Y x A x B |
|                           |       |                 | <0.05                            | <0.05 | 0.270 | <0.05 | <0.05 | 0.241     |
|                           |       |                 |                                  |       |       |       |       | <0.05     |

<sup>1</sup>; <sup>2</sup> see Table 4.

**Table S5.** Content of sugar in sugar beet roots depending on the form of silicon (A) and the term of foliar application (B) (in 2017–2019), %.

| Silicon form <sup>1</sup> |       |                 | Term of application <sup>1</sup> |       |       |       | Mean  |       |         |
|---------------------------|-------|-----------------|----------------------------------|-------|-------|-------|-------|-------|---------|
| B1                        |       |                 | B2                               |       | B3    |       |       |       |         |
| 2017                      |       |                 |                                  |       |       |       |       |       |         |
| A1                        | 17.72 | cd <sup>2</sup> | 17.52                            | bc    | 17.38 | ab    | 17.54 | AB    |         |
| A2                        | 17.18 | a               | 17.64                            | bcd   | 17.69 | cd    | 17.50 | A     |         |
| A3                        | 17.42 | ab              | 17.81                            | d     | 17.51 | bc    | 17.58 | AB    |         |
| A4                        | 17.49 | bc              | 17.72                            | cd    | 17.84 | d     | 17.68 | B     |         |
| Mean                      | 17.45 | A               | 17.67                            | B     | 17.60 | B     | 17.58 | B     |         |
| 2018                      |       |                 |                                  |       |       |       |       |       |         |
| A1                        | 16.28 | cdef            | 16.05                            | abc   | 16.14 | bcd   | 16.16 | B     |         |
| A2                        | 15.78 | ab              | 16.18                            | bcde  | 15.70 | a     | 15.88 | A     |         |
| A3                        | 16.59 | efg             | 16.83                            | g     | 16.50 | defg  | 16.64 | C     |         |
| A4                        | 16.61 | fg              | 16.75                            | g     | 16.79 | g     | 16.71 | C     |         |
| Mean                      | 16.31 | A               | 16.45                            | A     | 16.28 | A     | 16.35 | A     |         |
| 2019                      |       |                 |                                  |       |       |       |       |       |         |
| A1                        | 18.30 | a               | 18.71                            | abc   | 18.66 | abc   | 18.55 | A     |         |
| A2                        | 18.75 | abc             | 18.66                            | abc   | 18.61 | abc   | 18.67 | A     |         |
| A3                        | 18.45 | ab              | 18.91                            | bcd   | 18.52 | ab    | 18.63 | A     |         |
| A4                        | 19.06 | cd              | 18.82                            | bcd   | 19.25 | d     | 19.04 | B     |         |
| Mean                      | 18.64 | A               | 18.77                            | A     | 18.76 | A     | 18.72 | C     |         |
| 2017–2019                 |       |                 |                                  |       |       |       |       |       |         |
| A1                        | 17.43 | a               | 17.43                            | a     | 17.39 | a     | 17.42 | A     |         |
| A2                        | 17.24 | a               | 17.49                            | a     | 17.33 | a     | 17.35 | A     |         |
| A3                        | 17.49 | a               | 17.85                            | a     | 17.51 | a     | 17.61 | B     |         |
| A4                        | 17.72 | a               | 17.76                            | a     | 17.96 | a     | 17.81 | C     |         |
| Mean                      | 17.47 | A               | 17.63                            | B     | 17.55 | AB    | -     |       |         |
| P-values                  | based | on              | Y                                | A     | B     | Y x A | Y x B | A x B | Y x A x |
| ANOVA                     |       |                 |                                  |       |       |       |       |       | B       |
|                           |       |                 | <0.05                            | <0.05 | <0.05 | <0.05 | 0.650 | <0.05 | 0.059   |

<sup>1</sup>; <sup>2</sup> see Table 4.



**Table S6.** The content of  $\alpha$ -amino nitrogen in sugar beet roots depending on the form of silicon (A) and the term of foliar application (B) (in 2017–2019), mmol kg<sup>-1</sup>.

| Silicon form <sup>1</sup> |       |    | Term of application <sup>1</sup> |                 |       |       |       |       |         |   |
|---------------------------|-------|----|----------------------------------|-----------------|-------|-------|-------|-------|---------|---|
|                           |       |    | B1                               |                 | B2    |       | B3    |       | Mean    |   |
| 2017                      |       |    |                                  |                 |       |       |       |       |         |   |
| A1                        |       |    | 36.30                            | ef <sup>2</sup> | 27.55 | bc    | 23.60 | ab    | 29.15   | B |
| A2                        |       |    | 37.10                            | f               | 28.45 | c     | 34.35 | ef    | 33.30   | C |
| A3                        |       |    | 24.05                            | ab              | 29.85 | cd    | 32.75 | de    | 28.88   | B |
| A4                        |       |    | 22.10                            | a               | 29.00 | cd    | 23.85 | ab    | 24.98   | A |
| Mean                      |       |    | 29.89                            | A               | 28.71 | A     | 28.64 | A     | 29.08   | B |
| 2018                      |       |    |                                  |                 |       |       |       |       |         |   |
| A1                        |       |    | 27.55                            | a               | 27.85 | ab    | 26.90 | a     | 27.43   | A |
| A2                        |       |    | 30.95                            | cd              | 31.90 | cd    | 27.85 | ab    | 30.23   | B |
| A3                        |       |    | 33.85                            | d               | 27.50 | a     | 30.65 | bc    | 30.67   | B |
| A4                        |       |    | 27.20                            | a               | 30.55 | bc    | 31.45 | cd    | 29.73   | B |
| Mean                      |       |    | 29.89                            | A               | 29.45 | A     | 29.21 | A     | 29.52   | B |
| 2019                      |       |    |                                  |                 |       |       |       |       |         |   |
| A1                        |       |    | 17.05                            | bcdef           | 15.50 | abc   | 13.50 | a     | 15.35   | A |
| A2                        |       |    | 17.55                            | cdef            | 19.10 | f     | 16.65 | bcd   | 17.77   | B |
| A3                        |       |    | 16.80                            | bcde            | 15.20 | ab    | 17.75 | def   | 16.58   | B |
| A4                        |       |    | 18.80                            | ef              | 21.50 | g     | 22.20 | g     | 20.83   | C |
| Mean                      |       |    | 17.55                            | A               | 17.83 | A     | 17.53 | A     | 17.63   | A |
| 2017–2019                 |       |    |                                  |                 |       |       |       |       |         |   |
| A1                        |       |    | 26.97                            | bc              | 23.63 | abc   | 21.33 | a     | 23.98   | A |
| A2                        |       |    | 28.53                            | c               | 26.48 | abc   | 26.28 | abc   | 27.10   | C |
| A3                        |       |    | 24.90                            | abc             | 24.18 | abc   | 27.05 | bc    | 25.38   | B |
| A4                        |       |    | 22.70                            | ab              | 27.02 | bc    | 25.83 | abc   | 25.18   | B |
| Mean                      |       |    | 25.78                            | A               | 25.33 | A     | 25.13 | A     | -       |   |
| P-values                  | based | on | Y                                | A               | B     | Y x A | Y x B | A x B | Y x A x |   |
| ANOVA                     |       |    |                                  |                 |       |       |       |       | B       |   |
|                           |       |    | <0.05                            | <0.05           | 0.346 | <0.05 | 0.740 | <0.05 | <0.05   |   |

<sup>1</sup>; <sup>2</sup> see Table 4.

**Table S7.** Potassium content in sugar beet roots depending on the form of silicon (A) and the date of foliar application (B) (2017–2019), mmol kg<sup>-1</sup>.

| Silicon form <sup>1</sup> |       |       |                  | Term of application <sup>1</sup> |       |       |       | Mean  |           |
|---------------------------|-------|-------|------------------|----------------------------------|-------|-------|-------|-------|-----------|
|                           |       | B1    |                  | B2                               |       | B3    |       |       |           |
| 2017                      |       |       |                  |                                  |       |       |       |       |           |
| A1                        |       | 30.80 | abc <sup>2</sup> | 31.55                            | abc   | 28.75 | a     | 30.37 | A         |
| A2                        |       | 39.35 | f                | 34.95                            | de    | 38.75 | f     | 37.68 | C         |
| A3                        |       | 33.15 | cd               | 37.30                            | ef    | 32.20 | bcd   | 34.22 | B         |
| A4                        |       | 28.85 | ab               | 29.40                            | ab    | 28.70 | a     | 28.98 | A         |
| Mean                      |       | 33.04 | A                | 33.30                            | A     | 32.10 | A     | 32.81 | B         |
| 2018                      |       |       |                  |                                  |       |       |       |       |           |
| A1                        |       | 36.65 | a                | 35.50                            | a     | 34.55 | a     | 35.57 | A         |
| A2                        |       | 41.55 | cd               | 40.80                            | cd    | 43.20 | d     | 41.85 | C         |
| A3                        |       | 39.85 | c                | 36.85                            | ab    | 34.60 | a     | 37.10 | B         |
| A4                        |       | 36.60 | a                | 35.35                            | a     | 39.20 | bc    | 37.05 | B         |
| Mean                      |       | 38.66 | B                | 37.13                            | A     | 37.89 | AB    | 37.89 | C         |
| 2019                      |       |       |                  |                                  |       |       |       |       |           |
| A1                        |       | 29.40 | bc               | 26.80                            | a     | 29.55 | bcd   | 28.58 | A         |
| A2                        |       | 30.95 | e                | 30.95                            | e     | 28.40 | b     | 30.10 | B         |
| A3                        |       | 33.70 | fg               | 33.00                            | f     | 32.65 | f     | 33.12 | D         |
| A4                        |       | 30.45 | cde              | 34.85                            | g     | 30.90 | de    | 32.07 | C         |
| Mean                      |       | 31.13 | B                | 31.40                            | B     | 30.38 | A     | 30.97 | A         |
| 2017–2019                 |       |       |                  |                                  |       |       |       |       |           |
| A1                        |       | 32.28 | ab               | 31.28                            | a     | 30.95 | a     | 31.51 | A         |
| A2                        |       | 37.28 | d                | 35.57                            | bcd   | 36.78 | d     | 36.54 | D         |
| A3                        |       | 35.57 | bcd              | 35.72                            | cd    | 33.15 | abc   | 34.81 | C         |
| A4                        |       | 31.97 | a                | 33.20                            | abc   | 32.93 | abc   | 32.70 | B         |
| Mean                      |       | 34.28 | B                | 33.94                            | AB    | 33.45 | A     | -     |           |
| P-values                  | based | on    | Y                | A                                | B     | Y × A | Y × B | A × B | Y × A × B |
| ANOVA                     |       |       |                  |                                  |       |       |       |       |           |
|                           |       |       | <0.05            | <0.05                            | 0.077 | <0.05 | 0.108 | <0.05 | <0.05     |

<sup>1</sup>; <sup>2</sup> see Table 5.

**Table S8.** Sodium content in sugar beet roots depending on the form of silicon (A) and the date of foliar application (B) (in 2017–2019), mmol kg<sup>-1</sup>.

| Silicon form <sup>1</sup> |       |                | Term of application <sup>1</sup> |       |       |       | Mean  |       |           |
|---------------------------|-------|----------------|----------------------------------|-------|-------|-------|-------|-------|-----------|
| I                         |       |                | II                               |       | III   |       |       |       |           |
| 2017                      |       |                |                                  |       |       |       |       |       |           |
| A1                        | 3.55  | b <sup>2</sup> | 3.75                             | b     | 3.75  | b     | 3.68  | B     |           |
| A2                        | 5.60  | c              | 5.95                             | c     | 5.25  | c     | 5.60  | C     |           |
| A3                        | 3.80  | b              | 3.30                             | b     | 5.50  | c     | 4.20  | D     |           |
| A4                        | 2.30  | a              | 1.95                             | a     | 3.25  | b     | 2.50  | A     |           |
| Mean                      | 3.81  | A              | 3.74                             | A     | 4.44  | B     | 4.00  | C     |           |
| 2018                      |       |                |                                  |       |       |       |       |       |           |
| A1                        | 4.50  | f              | 4.30                             | ef    | 3.95  | def   | 4.25  | B     |           |
| A2                        | 4.25  | ef             | 3.90                             | def   | 3.65  | cde   | 3.93  | B     |           |
| A3                        | 3.10  | abc            | 2.50                             | a     | 3.45  | bcd   | 3.02  | A     |           |
| A4                        | 2.80  | ab             | 3.95                             | def   | 2.60  | a     | 3.12  | A     |           |
| Mean                      | 3.66  | A              | 3.66                             | A     | 3.41  | A     | 3.58  | B     |           |
| 2019                      |       |                |                                  |       |       |       |       |       |           |
| A1                        | 2.15  | de             | 1.60                             | ab    | 2.10  | de    | 1.95  | B     |           |
| A2                        | 1.80  | abcd           | 1.55                             | a     | 1.65  | abc   | 1.67  | A     |           |
| A3                        | 3.30  | g              | 2.00                             | cde   | 2.15  | de    | 2.48  | C     |           |
| A4                        | 2.35  | e              | 2.80                             | f     | 1.95  | bcd   | 2.37  | C     |           |
| Mean                      | 2.40  | B              | 1.99                             | A     | 1.96  | A     | 2.12  | A     |           |
| 2017–2019                 |       |                |                                  |       |       |       |       |       |           |
| A1                        | 3.40  | abcd           | 3.22                             | abcd  | 3.27  | abcd  | 3.29  | B     |           |
| A2                        | 3.88  | d              | 3.80                             | cd    | 3.52  | bcd   | 3.73  | C     |           |
| A3                        | 3.40  | abcd           | 2.60                             | ab    | 3.70  | cd    | 3.23  | B     |           |
| A4                        | 2.48  | a              | 2.90                             | abc   | 2.60  | ab    | 2.66  | A     |           |
| Mean                      | 3.29  | A              | 3.13                             | A     | 3.27  | A     | -     |       |           |
| P-value                   | based | on             | Y                                | A     | B     | Y x A | Y x B | A x B | Y x A x B |
| ANOVA                     |       |                |                                  |       |       |       |       |       |           |
|                           |       |                | <0.05                            | <0.05 | 0.159 | <0.05 | <0.05 | <0.05 | <0.05     |

<sup>1</sup>; <sup>2</sup> see Table 4.

**Table S9.** Biological yield of sugar depending on the form of silicon (A) and the term of foliar application (B) (in 2017–2019), t ha<sup>-1</sup>.

| Form of<br>silicon <sup>1</sup> |       | Term of application <sup>1</sup> |                   |       |       |       |       | Mean  |           |
|---------------------------------|-------|----------------------------------|-------------------|-------|-------|-------|-------|-------|-----------|
|                                 |       | B1                               |                   | B2    |       | B3    |       |       |           |
| 2017                            |       |                                  |                   |       |       |       |       |       |           |
| A1                              |       | 17.78                            | abcd <sup>2</sup> | 17.98 | abcd  | 17.96 | abcd  | 17.91 | A         |
| A2                              |       | 16.72                            | a                 | 17.17 | abc   | 19.06 | d     | 17.65 | A         |
| A3                              |       | 18.81                            | cd                | 16.93 | ab    | 17.34 | abc   | 17.70 | A         |
| A4                              |       | 18.47                            | bcd               | 18.81 | cd    | 19.33 | d     | 18.87 | B         |
| Mean                            |       | 17.94                            | A                 | 17.72 | A     | 18.42 | A     | 18.03 | C         |
| 2018                            |       |                                  |                   |       |       |       |       |       |           |
| A1                              |       | 10.57                            | a                 | 10.37 | ab    | 10.39 | a     | 10.45 | A         |
| A2                              |       | 9.57                             | cd                | 10.86 | cd    | 10.47 | ab    | 10.30 | A         |
| A3                              |       | 10.02                            | d                 | 11.69 | a     | 10.11 | bc    | 10.61 | A         |
| A4                              |       | 10.06                            | a                 | 10.92 | bc    | 10.67 | cd    | 10.55 | A         |
| Mean                            |       | 10.05                            | A                 | 10.96 | B     | 10.41 | AB    | 10.47 | A         |
| 2019                            |       |                                  |                   |       |       |       |       |       |           |
| A1                              |       | 16.47                            | c                 | 15.56 | bc    | 13.54 | ab    | 15.19 | B         |
| A2                              |       | 14.45                            | abc               | 12.75 | a     | 14.09 | ab    | 13.76 | A         |
| A3                              |       | 14.68                            | abc               | 14.89 | abc   | 13.14 | a     | 14.24 | AB        |
| A4                              |       | 14.76                            | abc               | 12.97 | a     | 13.50 | ab    | 13.74 | A         |
| Mean                            |       | 15.09                            | B                 | 14.04 | A     | 13.57 | A     | 14.23 | B         |
| 2017–2019                       |       |                                  |                   |       |       |       |       |       |           |
| A1                              |       | 14.94                            | a                 | 14.64 | a     | 13.96 | a     | 14.51 | B         |
| A2                              |       | 13.58                            | a                 | 13.59 | a     | 14.54 | a     | 13.90 | A         |
| A3                              |       | 14.50                            | a                 | 14.51 | a     | 13.53 | a     | 14.18 | AB        |
| A4                              |       | 14.43                            | a                 | 14.23 | a     | 14.50 | a     | 14.39 | AB        |
| Mean                            |       | 14.36                            | A                 | 14.24 | A     | 14.13 | A     | -     |           |
| P-values                        | based | on                               | Y                 | A     | B     | Y × A | Y × B | A × B | Y × A × B |
| ANOVA                           |       |                                  |                   |       |       |       |       |       |           |
|                                 |       |                                  | <0.05             | 0.190 | 0.670 | <0.05 | <0.05 | 0.058 | 0.314     |

<sup>1</sup>; <sup>2</sup> see Table 4.

**Table S10.** Pure sugar yield depending on the form of silicon (A) and the term of foliar application (B) (in 2017–2019), t ha<sup>-1</sup>.

| Silicon           |          | Term of application <sup>1</sup> |                    |       |        |       |       | Mean      |    |
|-------------------|----------|----------------------------------|--------------------|-------|--------|-------|-------|-----------|----|
| form <sup>1</sup> |          | B1                               |                    | B2    |        | B3    |       |           |    |
| 2017              |          |                                  |                    |       |        |       |       |           |    |
| A1                |          | 15.41                            | abcde <sup>2</sup> | 15.75 | abcdef | 15.86 | bcdef | 15.67     | A  |
| A2                |          | 14.28                            | a                  | 14.97 | abc    | 16.44 | cdef  | 15.23     | A  |
| A3                |          | 16.54                            | ef                 | 14.76 | ab     | 15.05 | abcd  | 15.45     | A  |
| A4                |          | 16.37                            | cdef               | 16.52 | def    | 17.12 | f     | 16.67     | B  |
| Mean              |          | 15.65                            | A                  | 15.50 | A      | 16.12 | A     | 15.76     | C  |
| 2018              |          |                                  |                    |       |        |       |       |           |    |
| A1                |          | 9.12                             | abc                | 8.94  | ab     | 8.98  | ab    | 9.01      | A  |
| A2                |          | 8.13                             | a                  | 9.26  | bc     | 8.92  | ab    | 8.77      | A  |
| A3                |          | 8.57                             | ab                 | 10.16 | c      | 8.72  | ab    | 9.15      | A  |
| A4                |          | 8.72                             | ab                 | 9.43  | bc     | 9.19  | abc   | 9.11      | A  |
| Mean              |          | 8.63                             | A                  | 9.44  | B      | 8.95  | AB    | 9.01      | A  |
| 2019              |          |                                  |                    |       |        |       |       |           |    |
| A1                |          | 14.79                            | c                  | 14.07 | bc     | 12.24 | ab    | 13.70     | B  |
| A2                |          | 12.99                            | abc                | 11.43 | a      | 12.69 | ab    | 12.37     | A  |
| A3                |          | 13.15                            | abc                | 13.42 | abc    | 11.78 | a     | 12.78     | AB |
| A4                |          | 13.27                            | abc                | 11.56 | a      | 12.09 | ab    | 12.31     | A  |
| Mean              |          | 13.55                            | B                  | 12.62 | A      | 12.20 | A     | 12.79     | B  |
| 2017–2019         |          |                                  |                    |       |        |       |       |           |    |
| A1                |          | 13.11                            | a                  | 12.92 | a      | 12.36 | a     | 12.79     | B  |
| A2                |          | 11.80                            | a                  | 11.89 | a      | 12.69 | a     | 12.12     | A  |
| A3                |          | 12.75                            | a                  | 12.78 | a      | 11.85 | a     | 12.46     | AB |
| A4                |          | 12.79                            | a                  | 12.50 | a      | 12.80 | a     | 12.70     | B  |
| Mean              |          | 12.61                            | A                  | 12.52 | A      | 12.42 | A     | -         |    |
| P-value           | based on | Y                                | A                  | B     | Y x A  | Y x B | A x B | Y x A x B |    |
| ANOVA             |          |                                  |                    |       |        |       |       |           |    |
|                   |          | <0.05                            | 0.061              | 0.715 | <0.05  | <0.05 | 0.058 | 0.196     |    |

<sup>1</sup>; <sup>2</sup> see Table 4.
